# Supplementary material
Source: publisher site journal article supplement (https://www.dovepress.com/article/251120)
Supplement: Supplementary file 1 [file get_supplementary_file.php]

## Online Repository

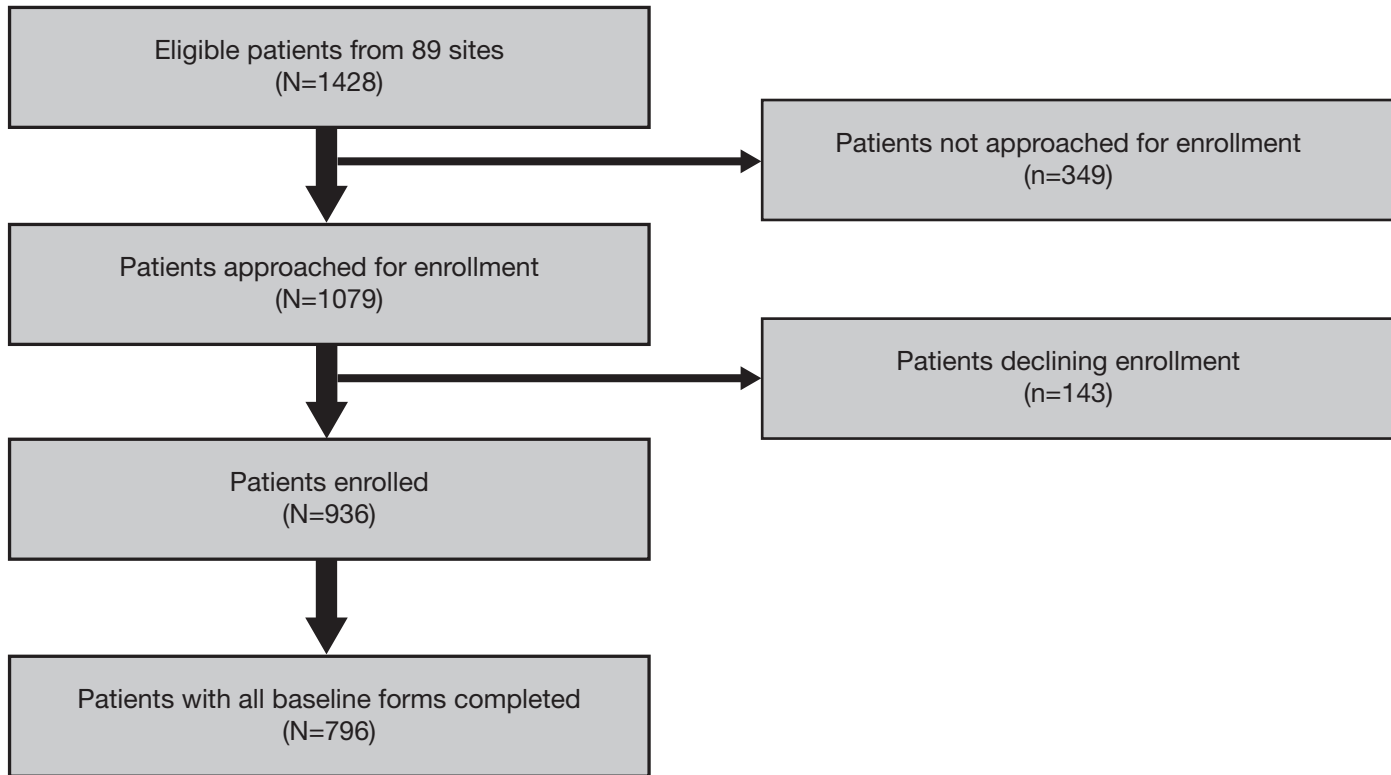

**Figure E1. Patient flow diagram.** Of 1428 eligible patients screened for enrollment in CHRONICLE, 796 were enrolled with all baseline forms completed as of the current analysis.
